# Supplementary material for: Ferrochelatase is a therapeutic target for ocular neovascularization
Source: PubMed Central journal article supplement (PMC5452042; doi:10.15252/emmm.201606561), 2017-04-04

**Fig. 2A**

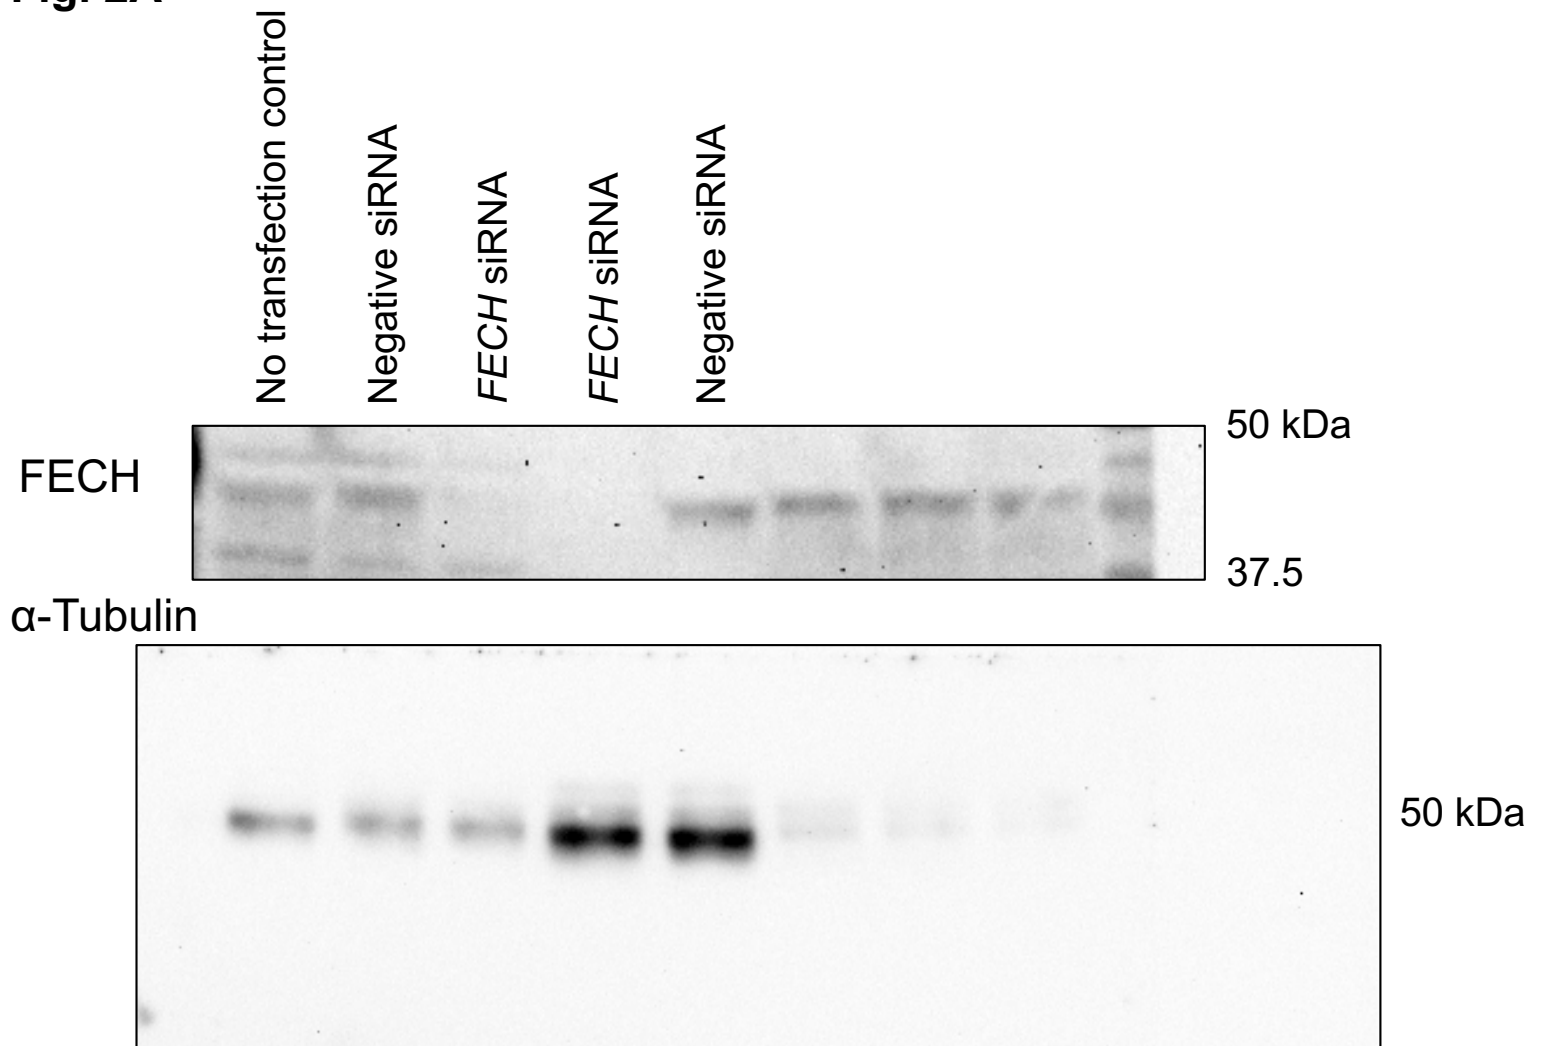

Supplement: EMMM-9-786-s004.pdf [file EMMM-9-786-s004.pdf]
