# Supplementary material for: Ferrochelatase is a therapeutic target for ocular neovascularization
Source: PubMed Central journal article supplement (PMC5452042; doi:10.15252/emmm.201606561), 2017-04-04
Supplement: EMMM-9-786-s005.pdf [file EMMM-9-786-s005.pdf]

**Fig. 6A**

No transfection control    Negative siRNA    *FECH* siRNA

eNOS

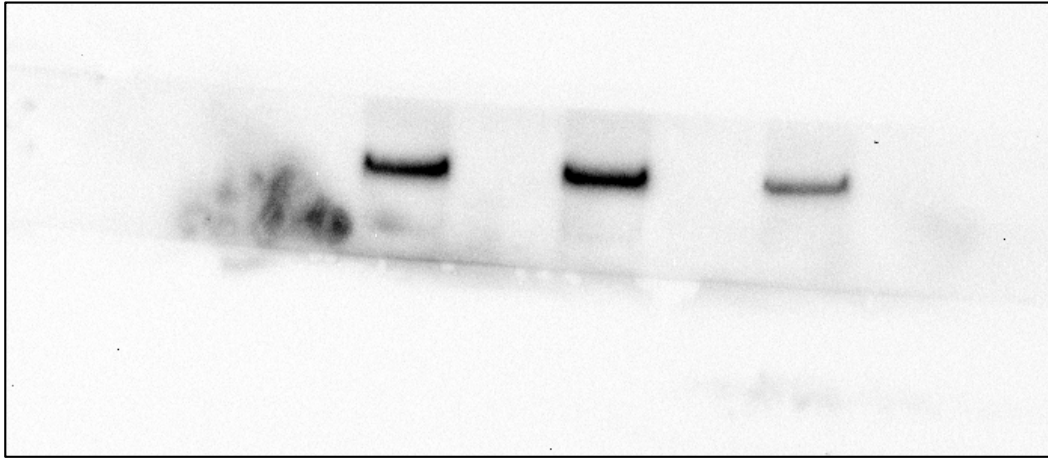

150 kDa

$\alpha$ -Tubulin

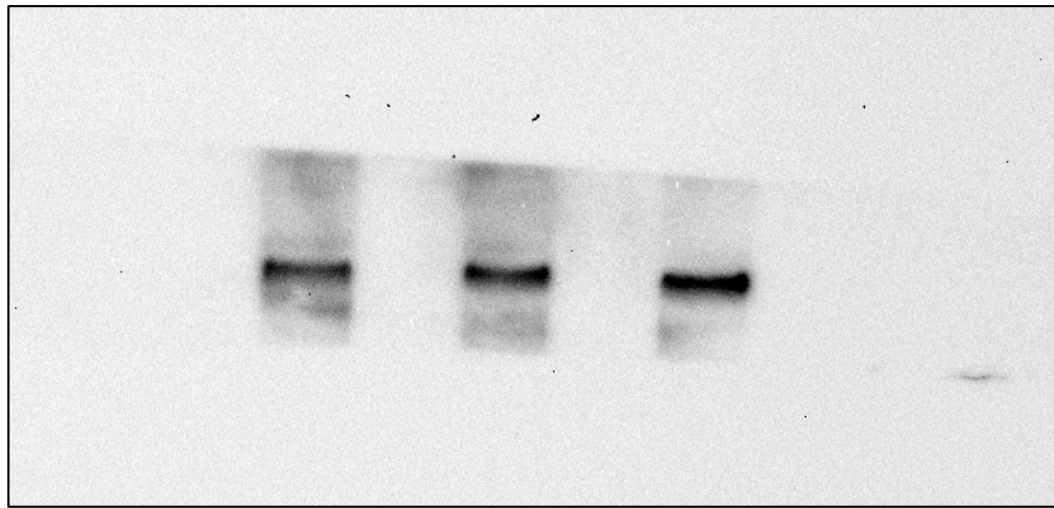

50 kDa

**Fig. 6C**

eNOS

Positive  
control

DMSO

NMPP

DMSO

NMPP

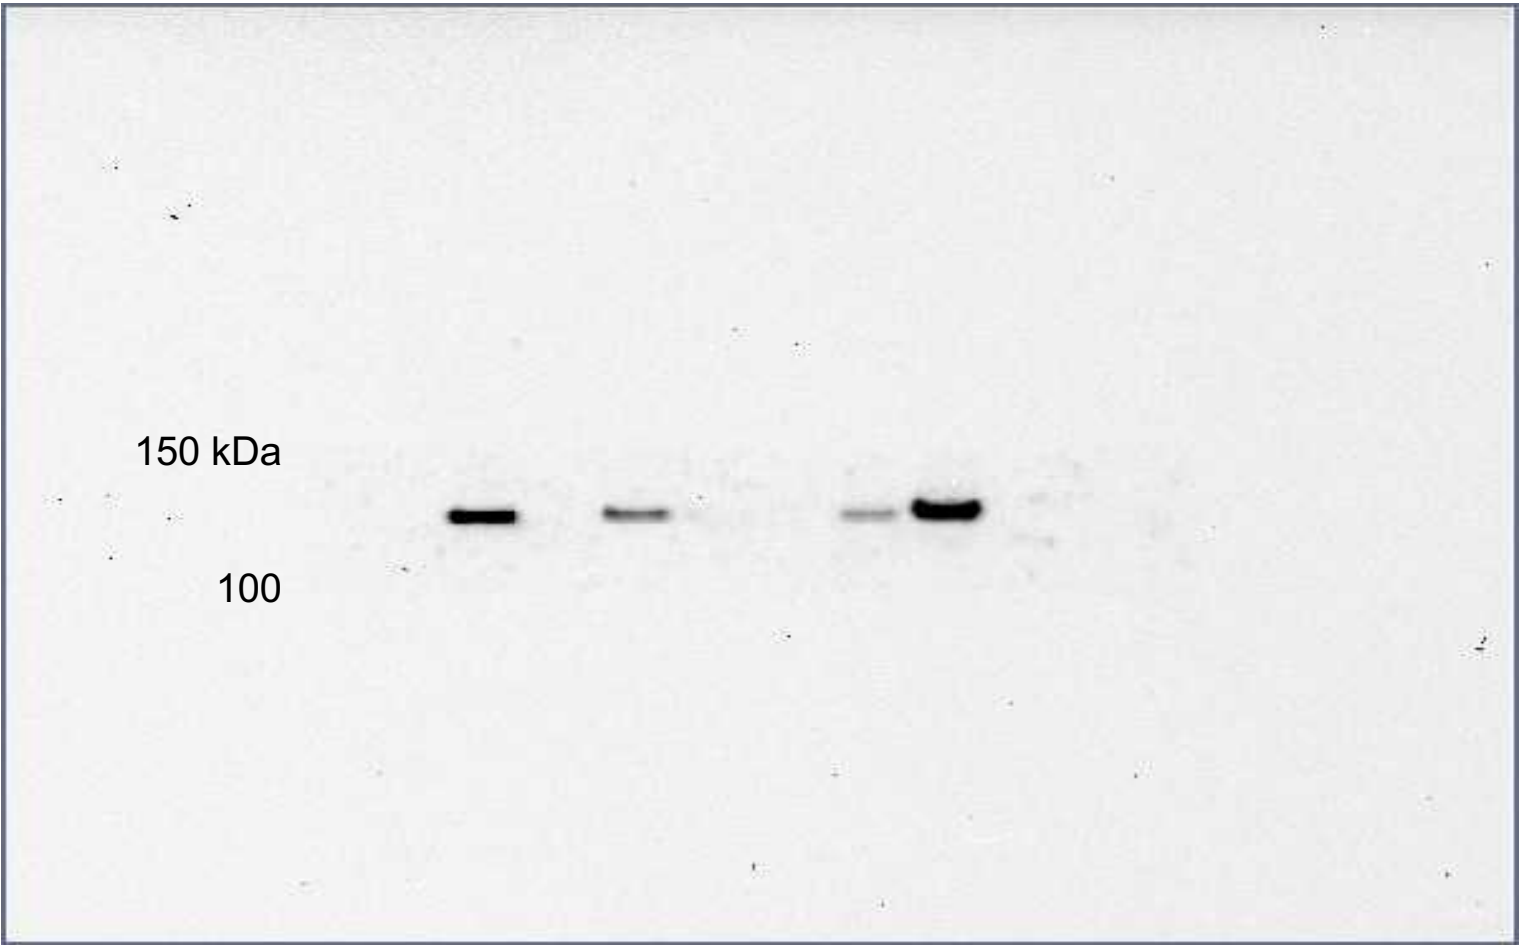

$\alpha$ -Tubulin

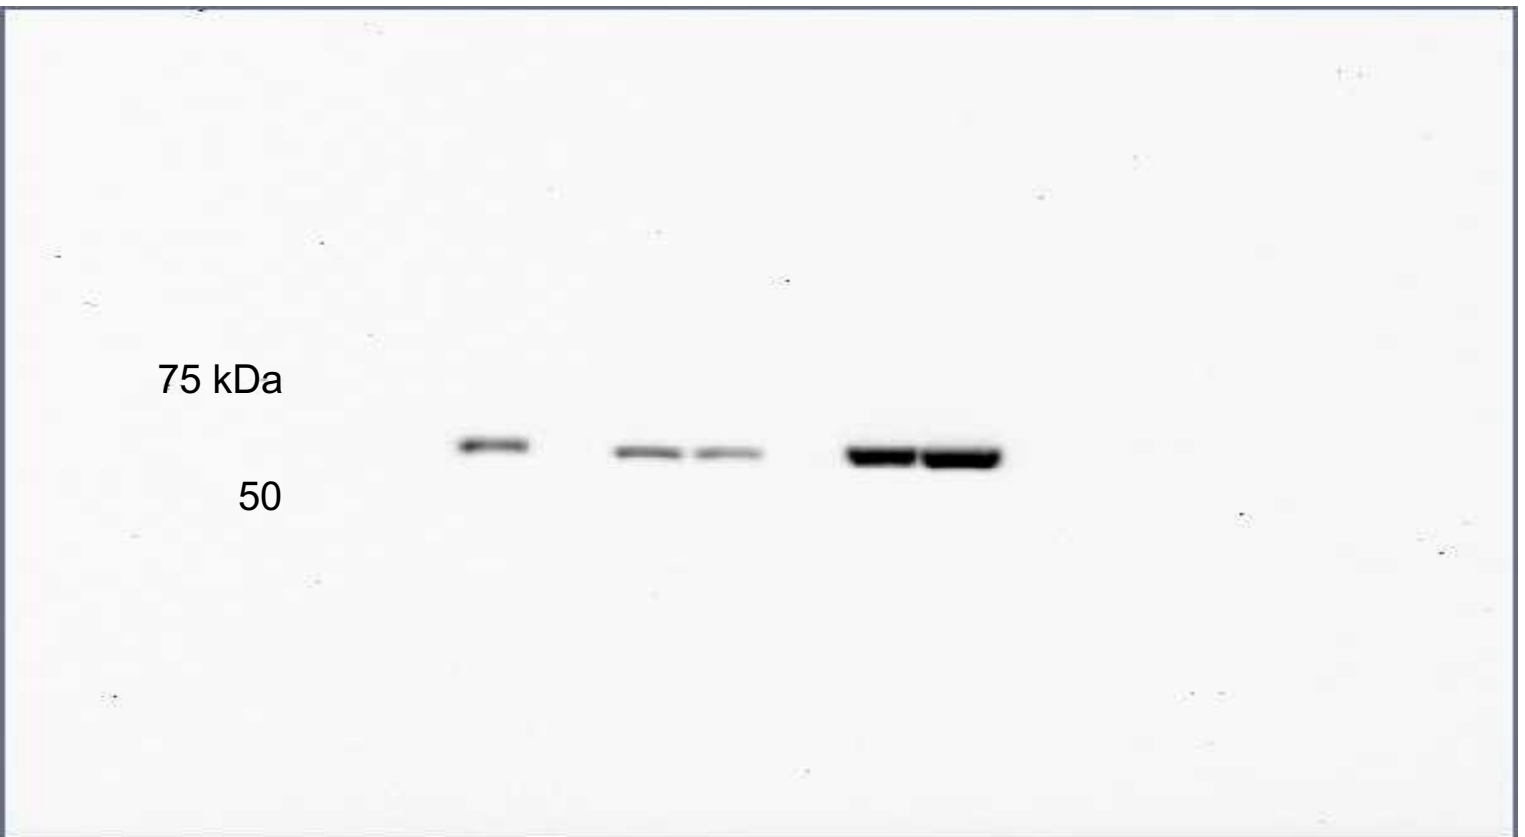

**Fig. 6D**

*FECH* siRNA    Negative siRNA    No transfection control

HIF-1 $\alpha$

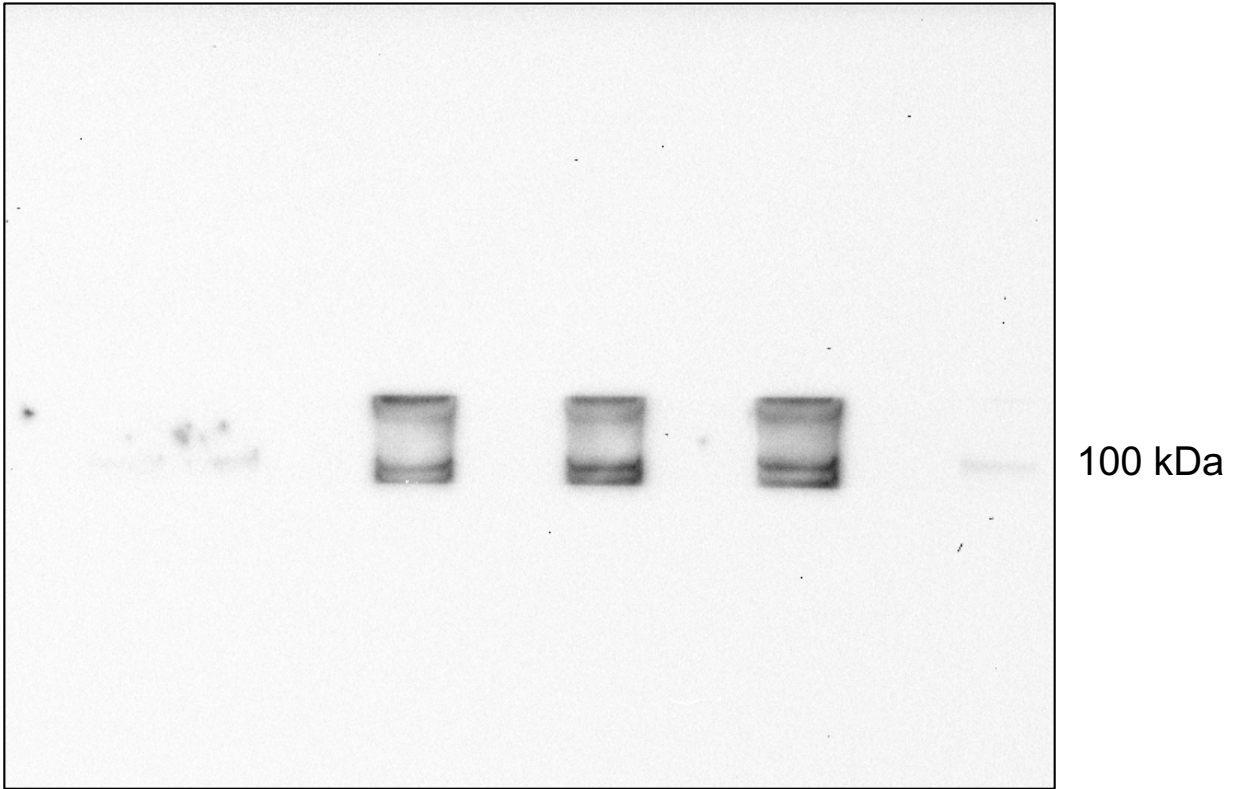

$\alpha$ -Tubulin

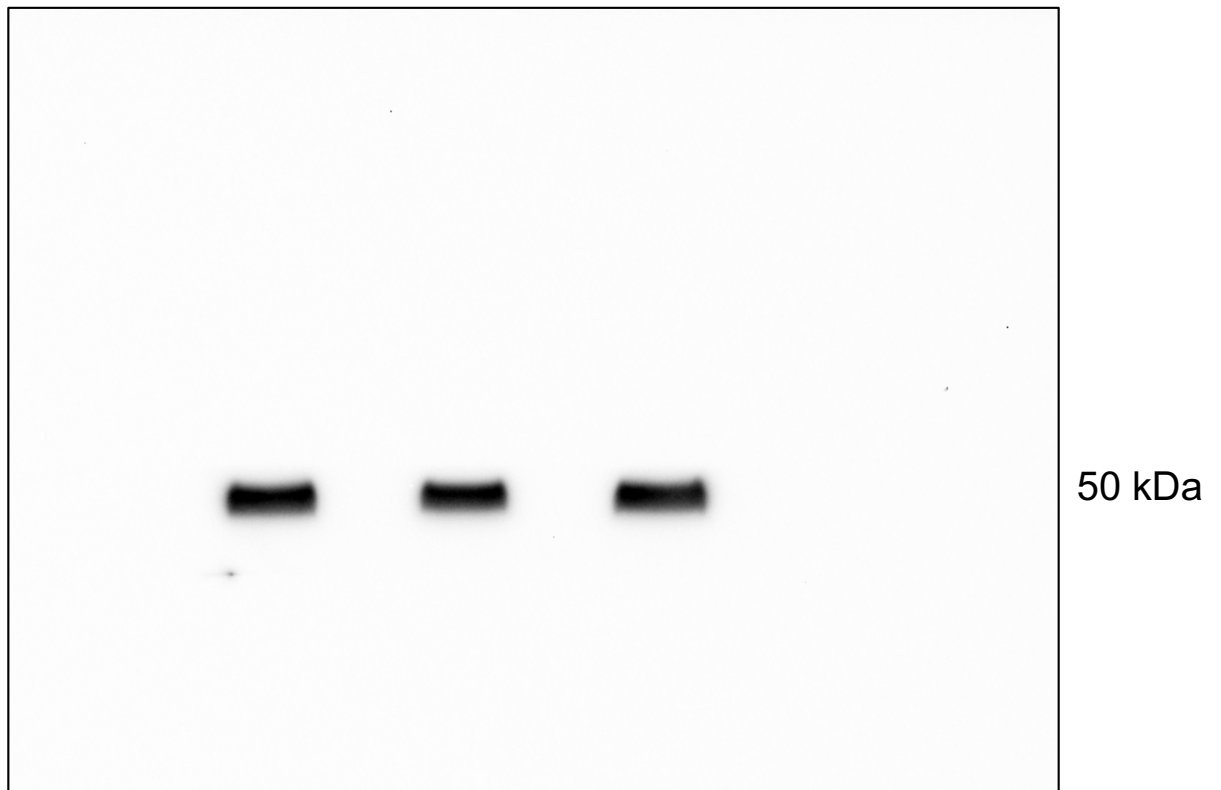

**Fig. 6E:**  
**Top Panel**

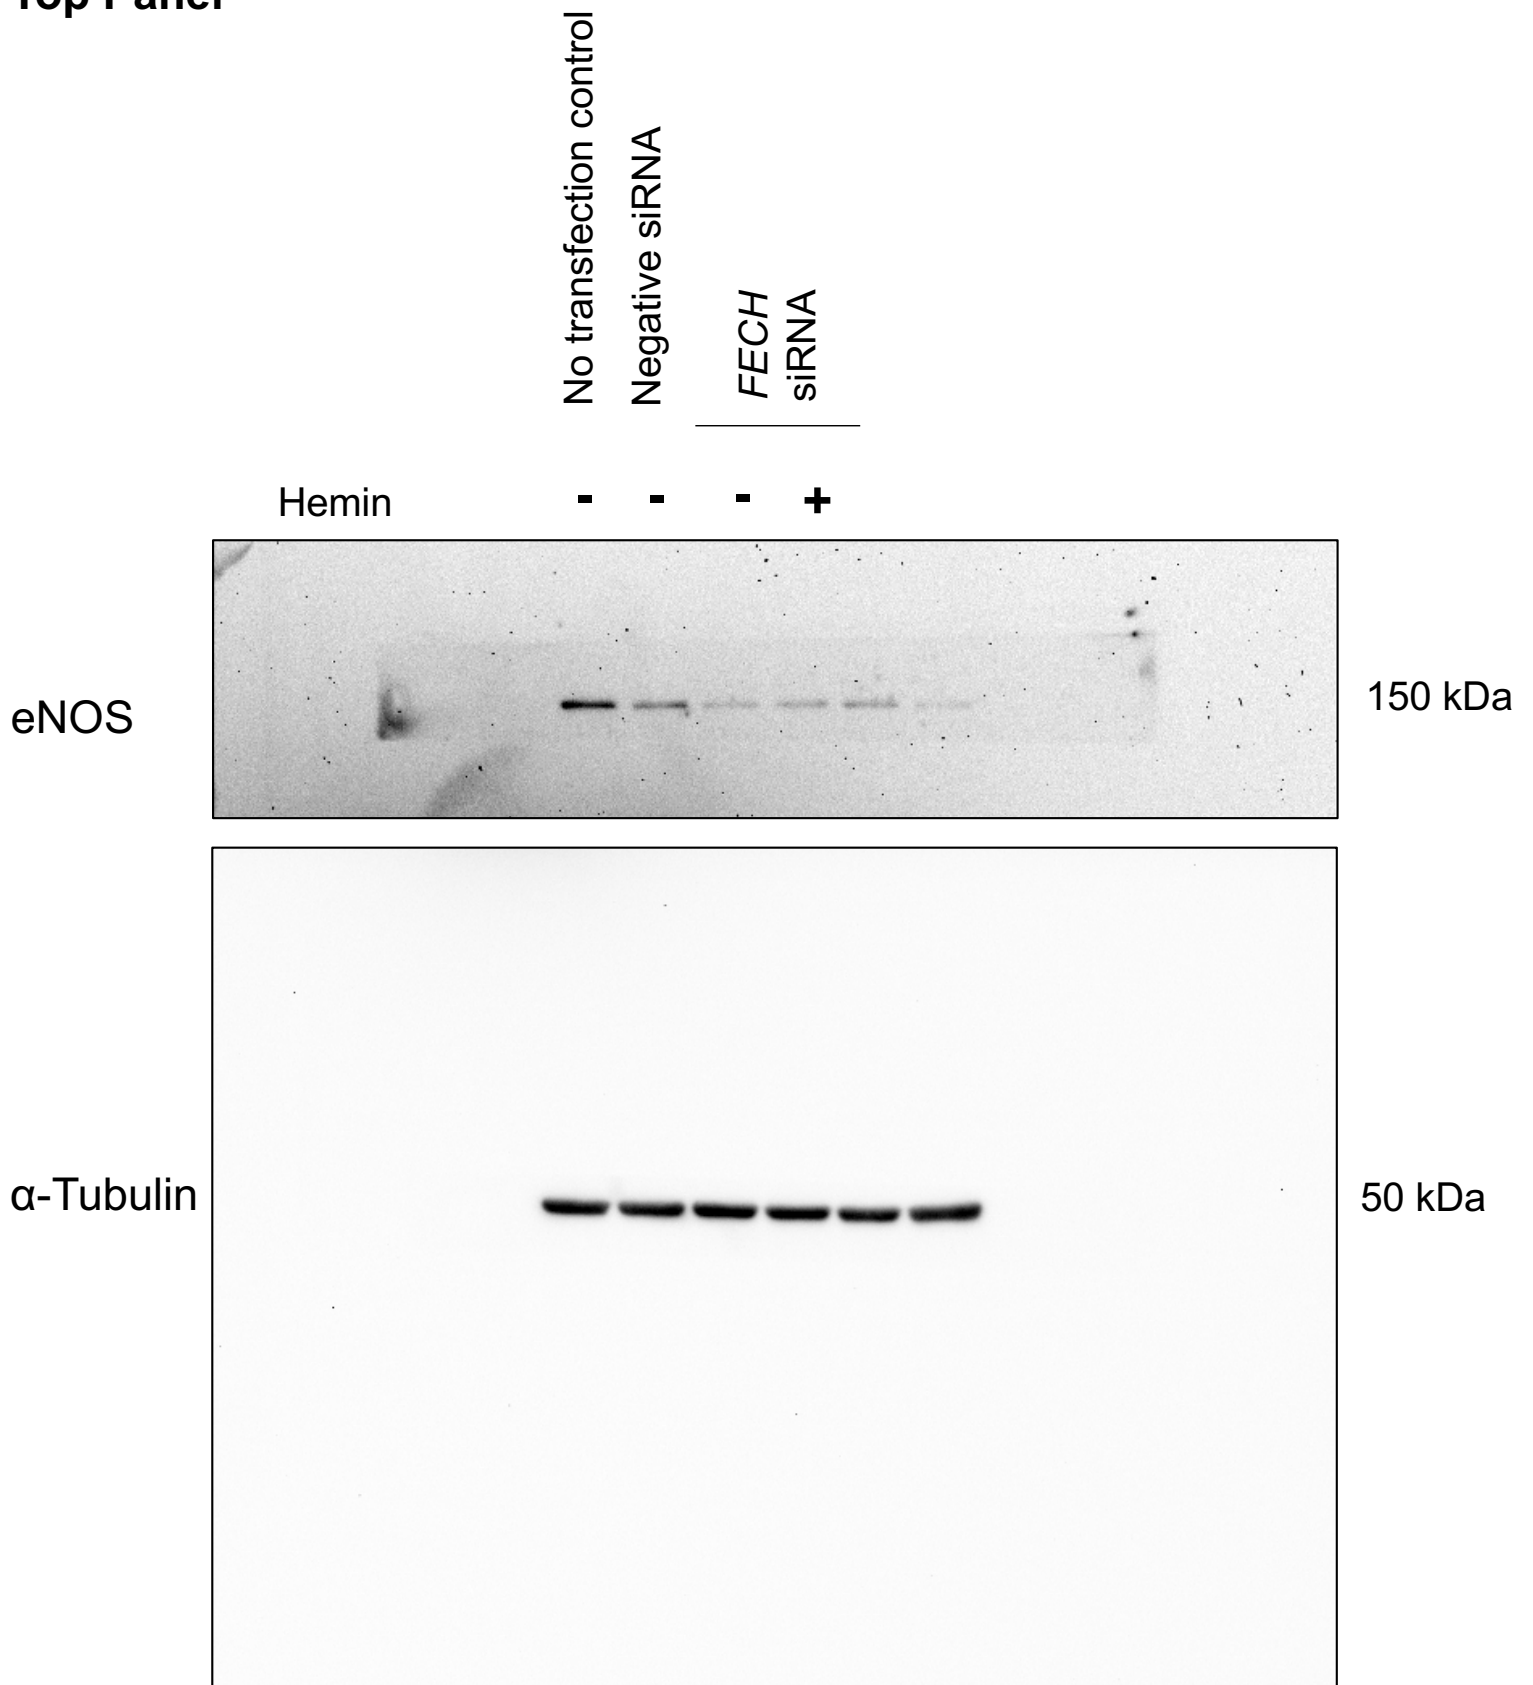

**Fig. 6E:**  
**Second Panel**

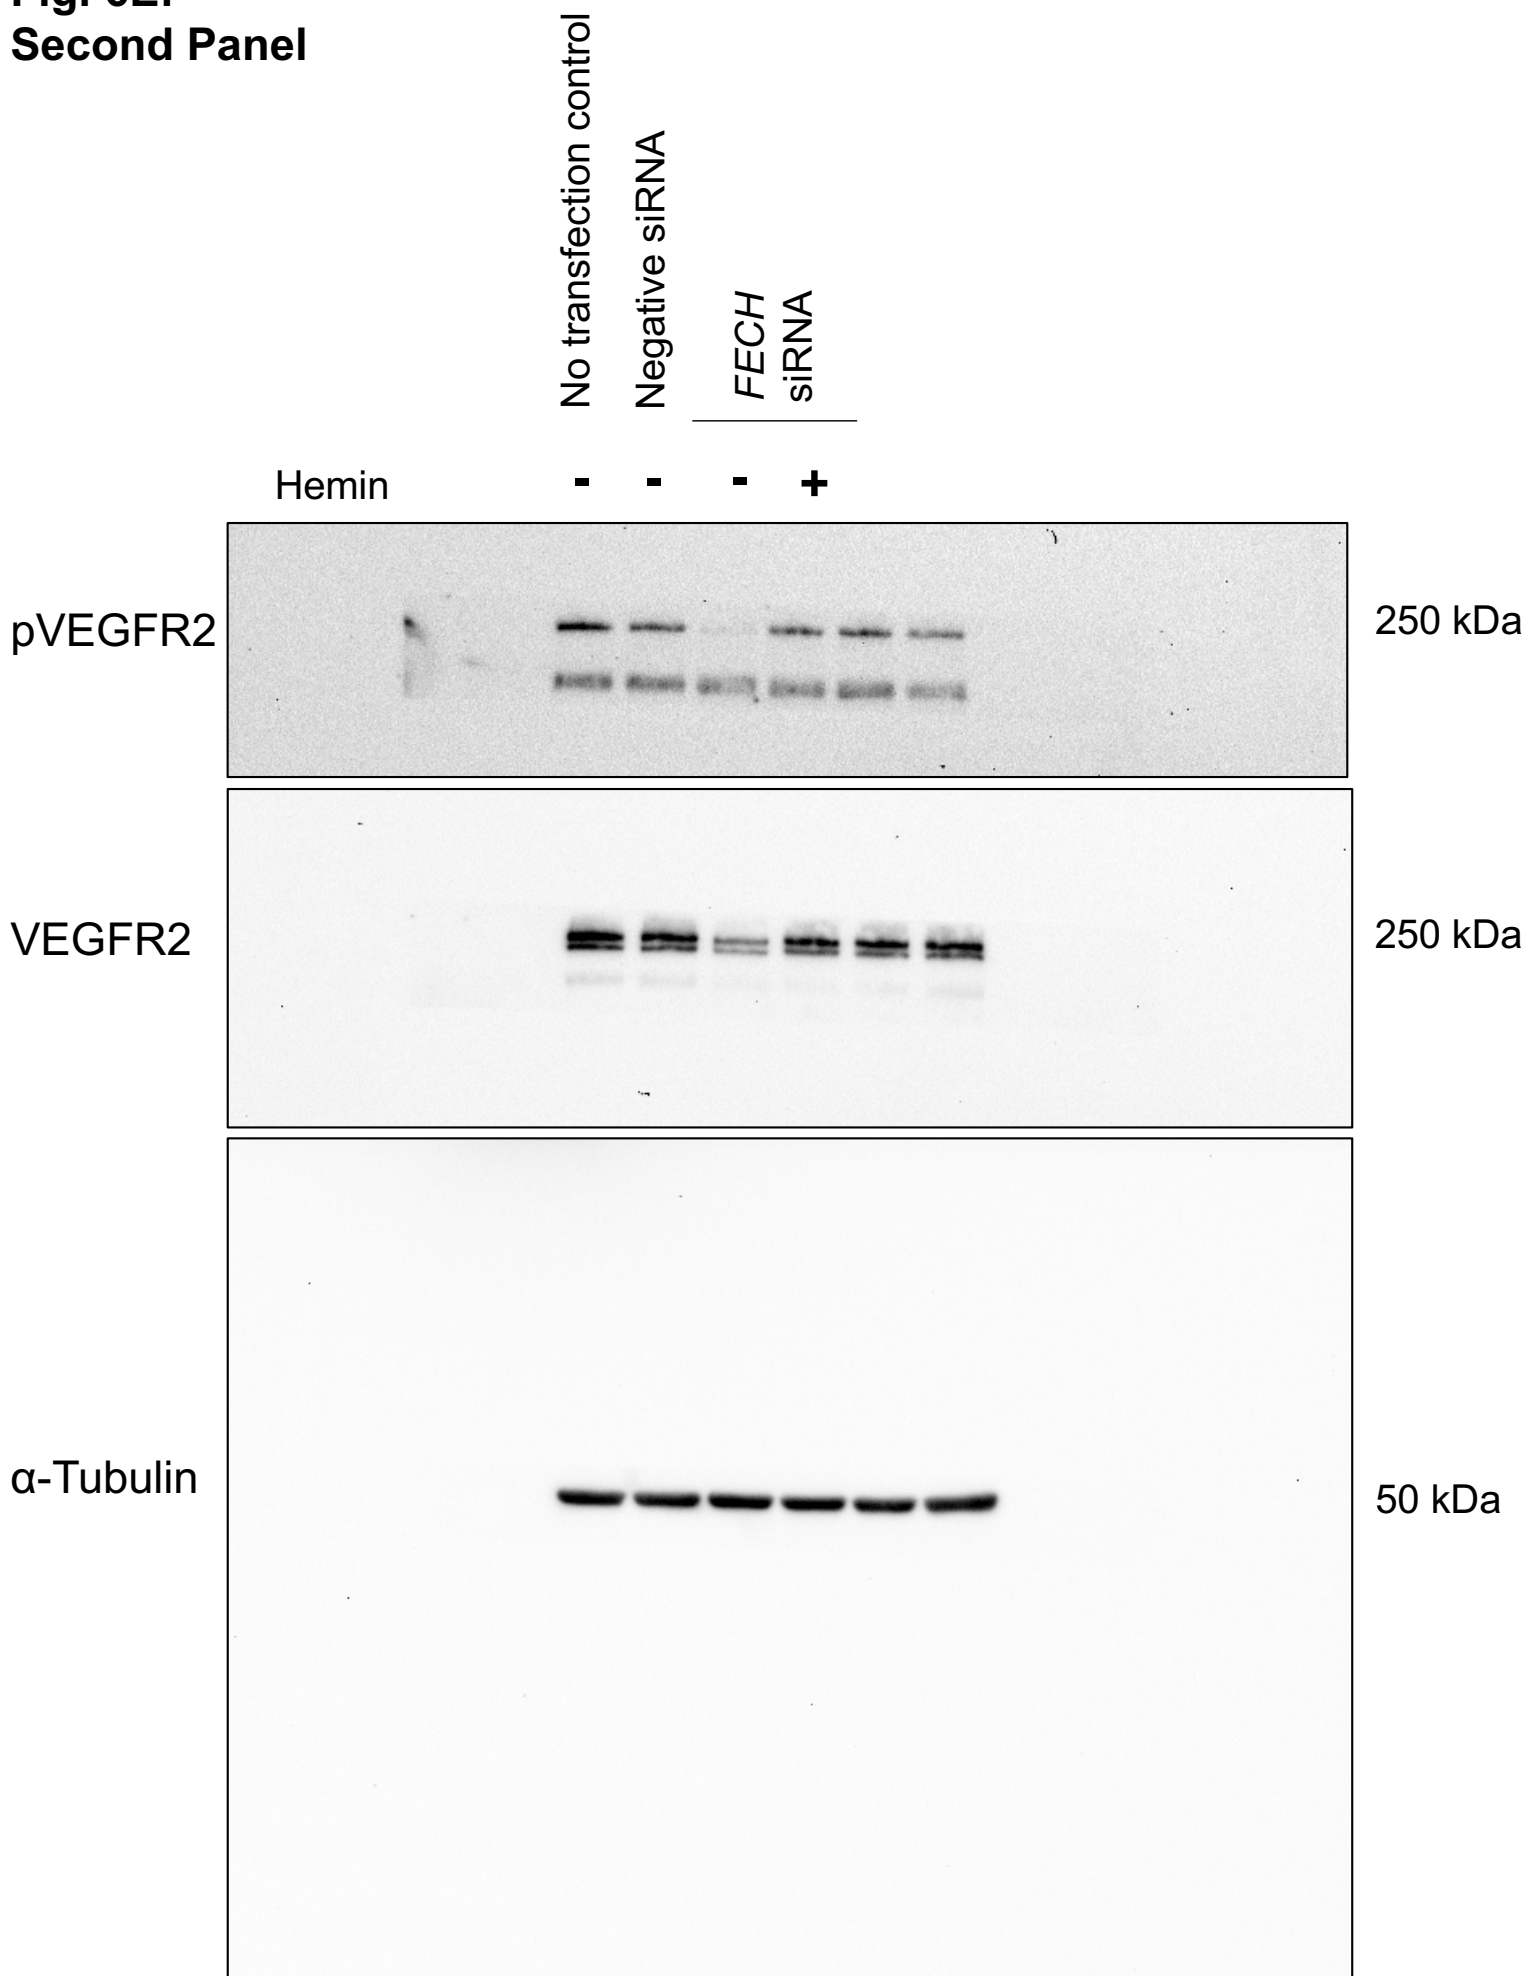

**Fig. 6E:**  
**Third Panel**

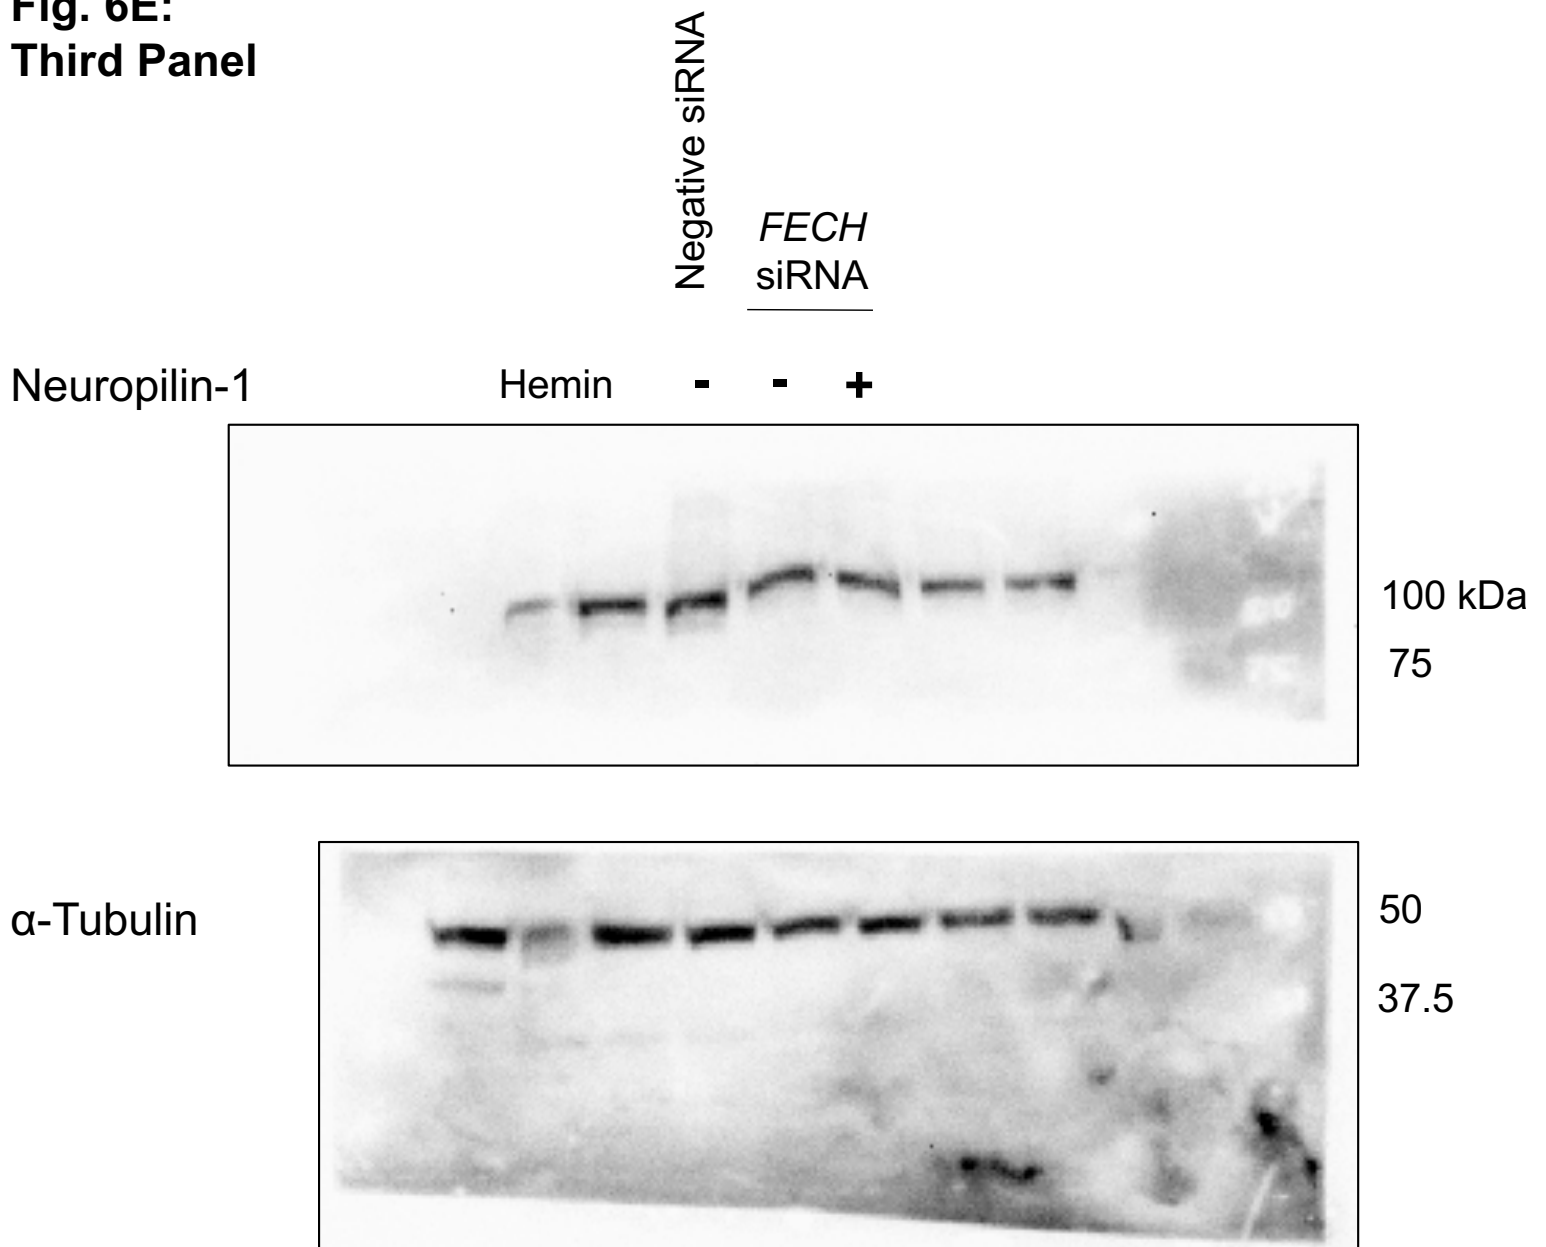

**Fig. 6E:**  
**Bottom Panel**

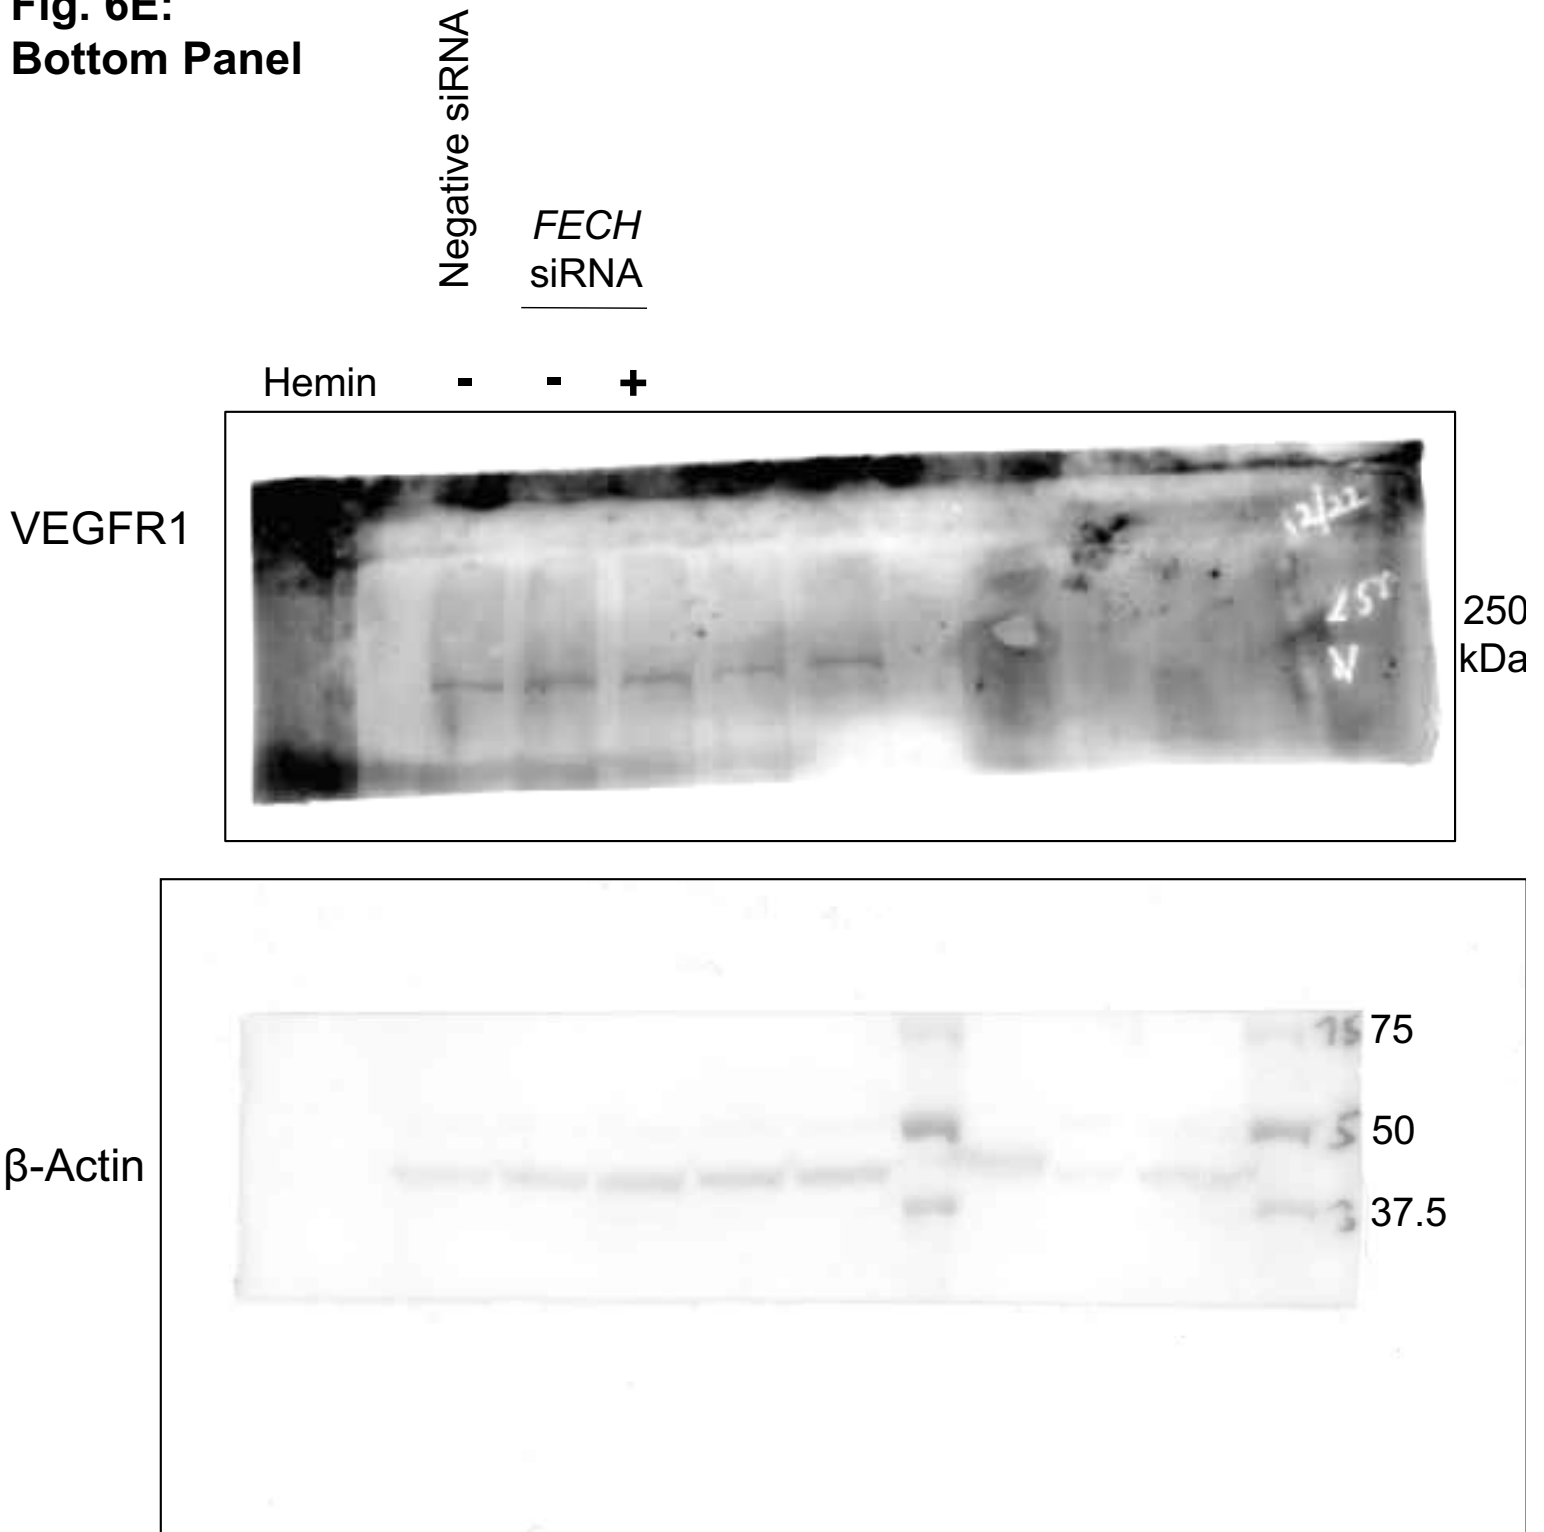

**Fig. 6F**

Negative *FECH*  
siRNA siRNA

p-eIF2 $\alpha$

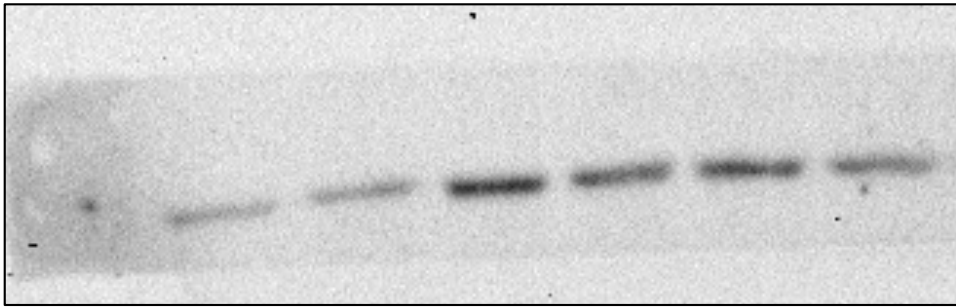

37.5 kDa

eIF2 $\alpha$

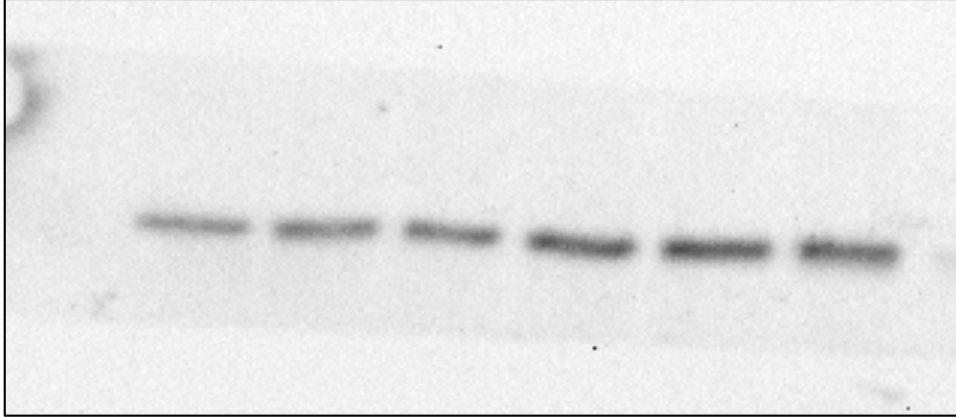

37.5 kDa

Hsp90

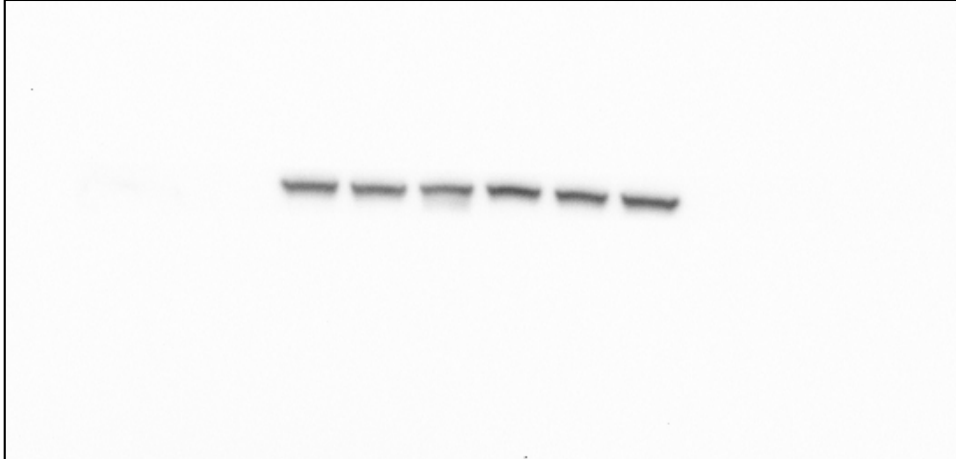

100 kDa

$\beta$ -Actin

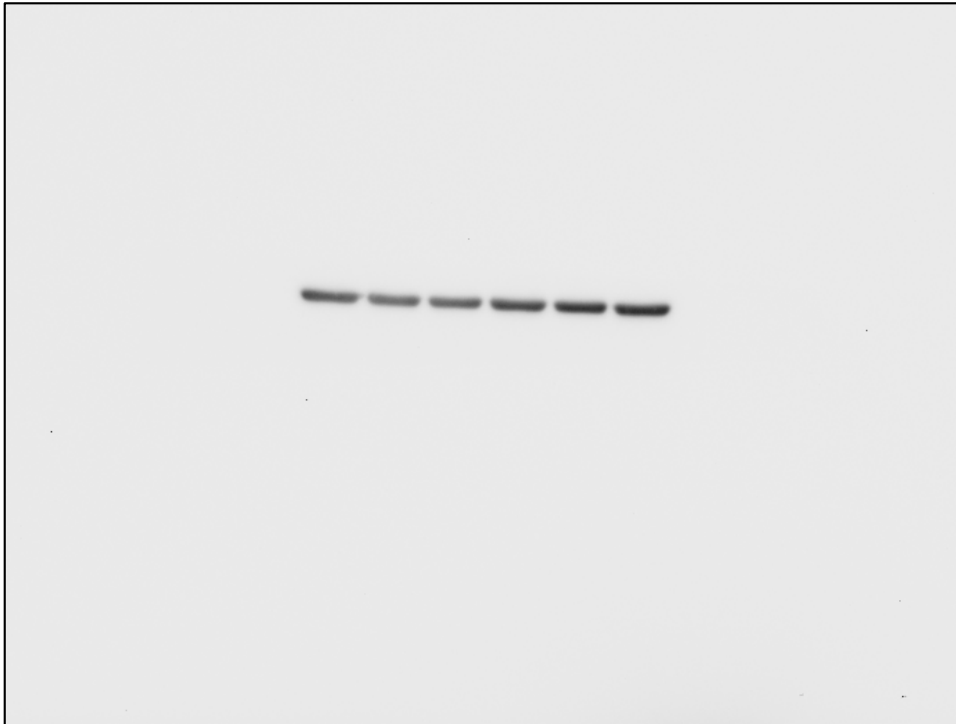

50 kDa  
37.5
