# Supplementary material for: Ferrochelatase is a therapeutic target for ocular neovascularization
Source: EMBO Mol Med. 2017 Apr 4;9(6):786–801. doi: 10.15252/emmm.201606561 (PMC5452042; doi:10.15252/emmm.201606561)
Supplement: Supplementary file 2 — Expanded View Figures PDF [file EMMM-9-786-s002.pdf]

Expanded View Figures

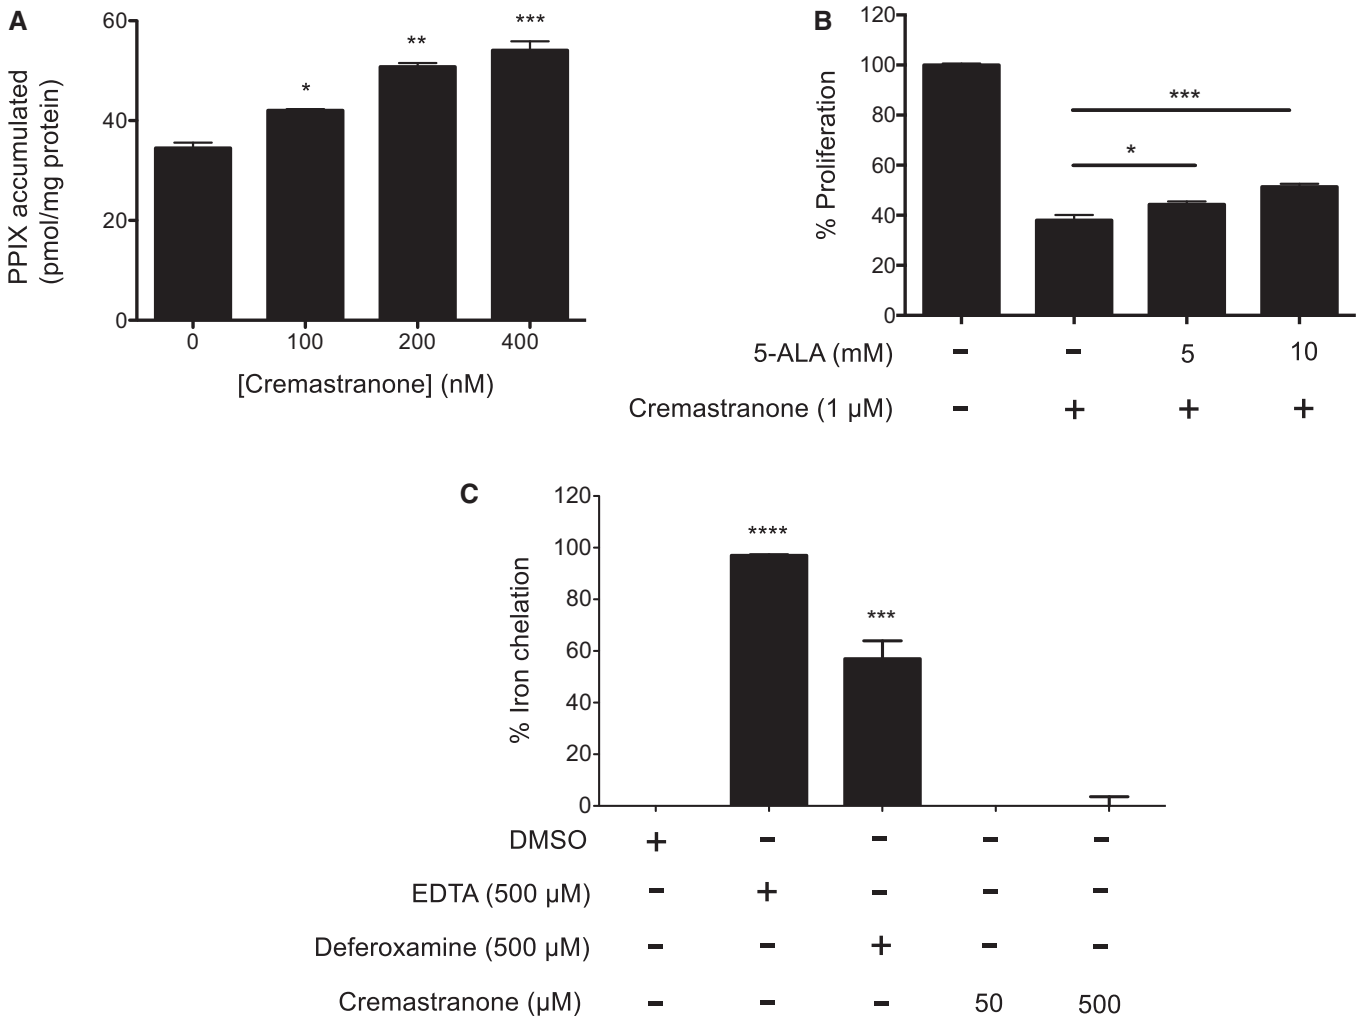

**Figure EV1. Validation of cremastranone's inhibition of FECH.**

A 5-Aminolevulinic acid (5-ALA)-induced protoporphyrin IX (PPIX) buildup in HRECs after cremastranone treatment. \**P* = 0.0201; \*\**P* = 0.0012; \*\*\**P* = 0.0006 relative to no cremastranone control, ANOVA with Dunnett's *post hoc* tests (*n* = 3 per group).

B Partial rescue of cremastranone's inhibition of HREC proliferation with 5-ALA, an inducer of heme biosynthesis. HRECs treated with DMSO only are shown as 100% proliferation control. \**P* = 0.046; \*\*\**P* = 0.0006, ANOVA with Tukey's *post hoc* tests (*n* = 3 per group).

C Cremastranone does not bind iron as determined in an iron chelation assay; EDTA and deferoxamine are positive controls. \*\*\*\**P* = 0.0001; \*\*\**P* = 0.0003 relative to DMSO control, ANOVA with Dunnett's *post hoc* tests (*n* = 2 per group).

Data information: Representative figures from at least three independent experiments. Graphs show mean ± SEM.

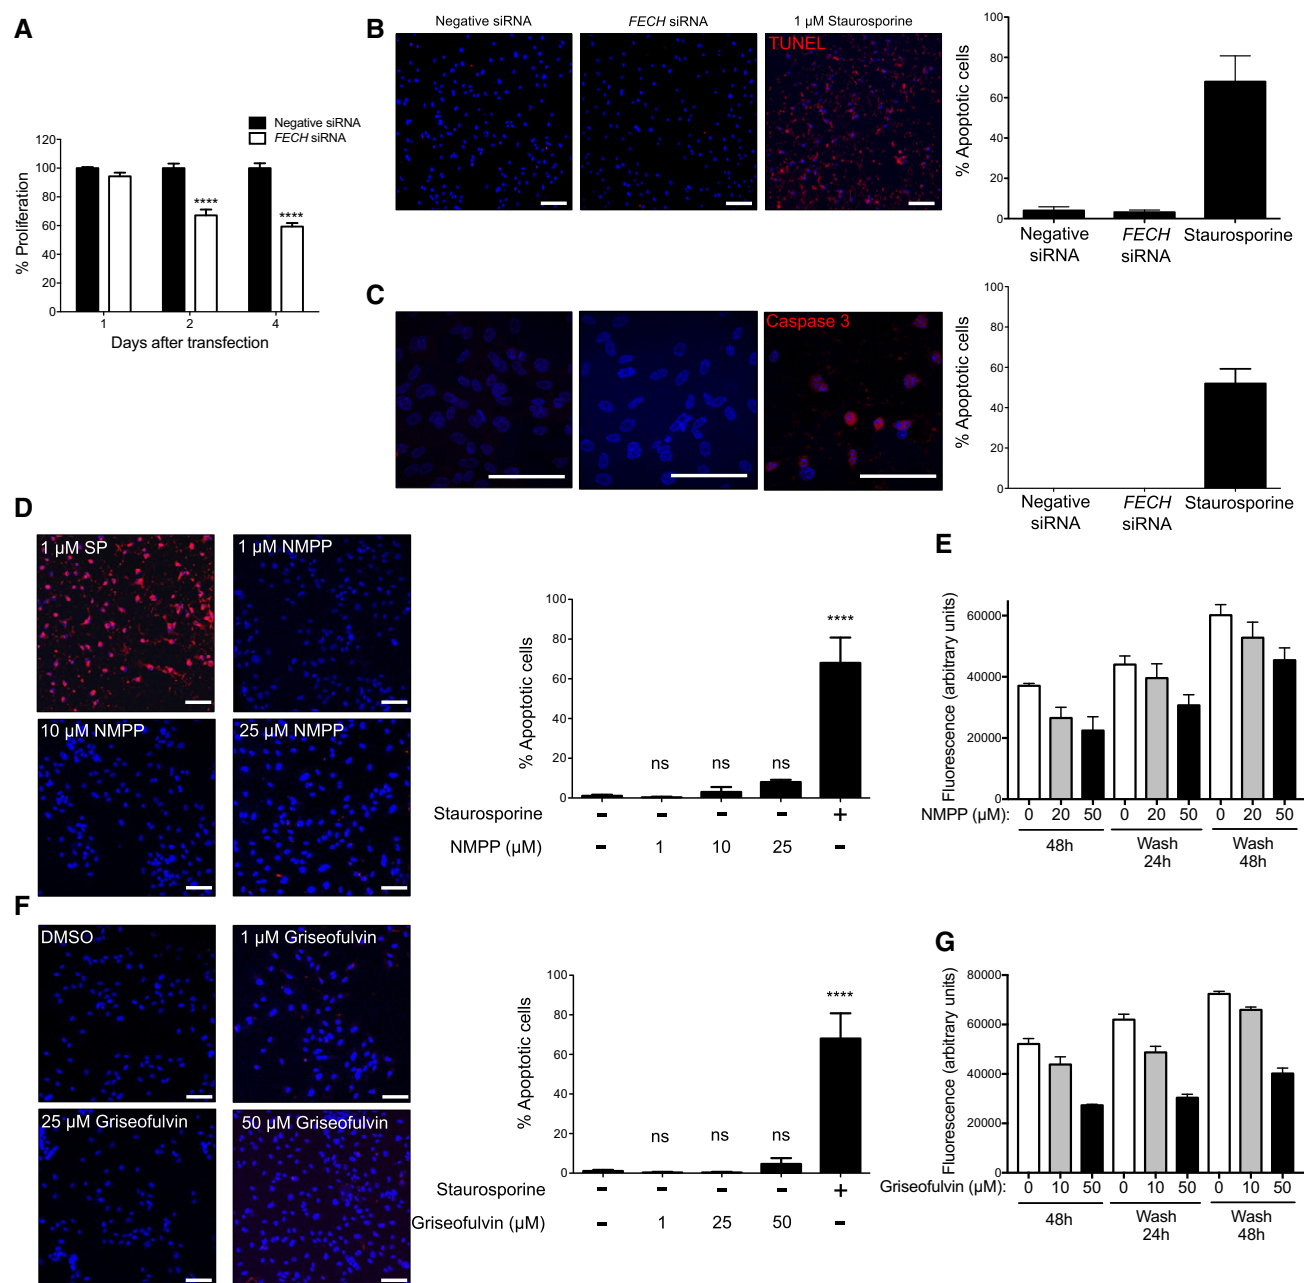

**Figure EV2. Effects of FECH inhibition on HRECs.**

- A Time course of the effect of FECH siRNA on proliferation of HRECs. The % proliferation calculated are with respect to proliferation with negative control siRNA. \*\*\*\* $P$  = 0.0001 versus negative siRNA at same time point, two-way ANOVA with Bonferroni's *post hoc* tests.
- B FECH knockdown does not induce apoptosis, as assessed by TUNEL (red). Staurosporine (1  $\mu$ M) is a positive control.
- C FECH knockdown does not induce apoptosis, as assessed by activated caspase-3 immunostaining (red). Staurosporine (1  $\mu$ M) is a positive control.
- D Apoptosis of HRECs after treatment with different doses of NMPP as assessed by TUNEL assay. ns, not significant; \*\*\*\* $P$  = 0.0001 as compared with no treatment group, ANOVA with Tukey's *post hoc* tests. Staurosporine (SP) is positive control.
- E Washout of NMPP reverses antiproliferative effects. HRECs were treated for 48 h with the indicated concentrations of NMPP; then, drug was removed and proliferation assessed 24 and 48 h later by AlamarBlue.
- F Apoptosis of HRECs after treatment with different doses of griseofulvin as assessed by TUNEL assay. ns, not significant; \*\*\*\* $P$  = 0.0001 as compared with no treatment group, ANOVA with Tukey's *post hoc* tests.
- G Washout of griseofulvin reverses antiproliferative effects. HRECs were treated for 48 h with the indicated concentrations of griseofulvin; then, drug was removed and proliferation assessed 24 and 48 h later by AlamarBlue.

Data information: Representative figures from at least three independent experiments. Graphs show mean  $\pm$  SEM,  $n$  = 3. Scale bars = 1 mm.

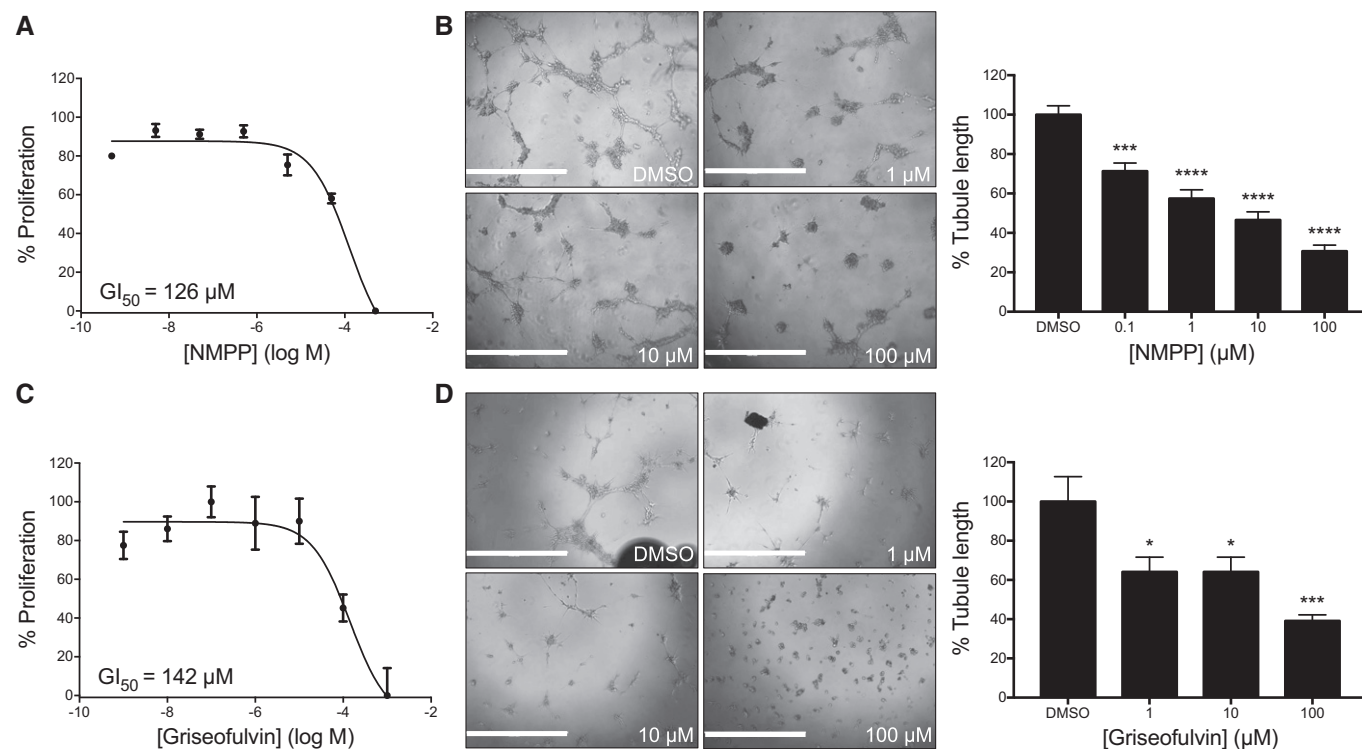

**Figure EV3. Effects of FECH inhibition on Rf/6a choroidal endothelial cells.**

A The effect of NMPP, a specific inhibitor of FECH activity, on *in vitro* proliferation was measured using an AlamarBlue assay ( $n = 3$  per dose).

B Ability of NMPP-treated Rf/6a cells to form tubular structures in Matrigel was monitored and analyzed using ImageJ. \*\*\* $P = 0.0002$ ; \*\*\*\* $P = 0.0001$  compared to DMSO-treated sample, ANOVA with Dunnett's *post hoc* tests ( $n = 6$  per group).

C The effect of griseofulvin on *in vitro* proliferation was measured using an AlamarBlue assay ( $n = 3$  per dose).

D Ability of griseofulvin-treated Rf/6a cells to form tubular structures in Matrigel was monitored and analyzed using ImageJ. \* $P = 0.018$ ; \*\*\* $P = 0.0002$  compared to DMSO-treated sample, ANOVA with Dunnett's *post hoc* tests ( $n = 6$  per group).

Data information: Representative figures from at least three independent experiments. Graphs show mean  $\pm$  SEM. Scale bars = 1 mm.

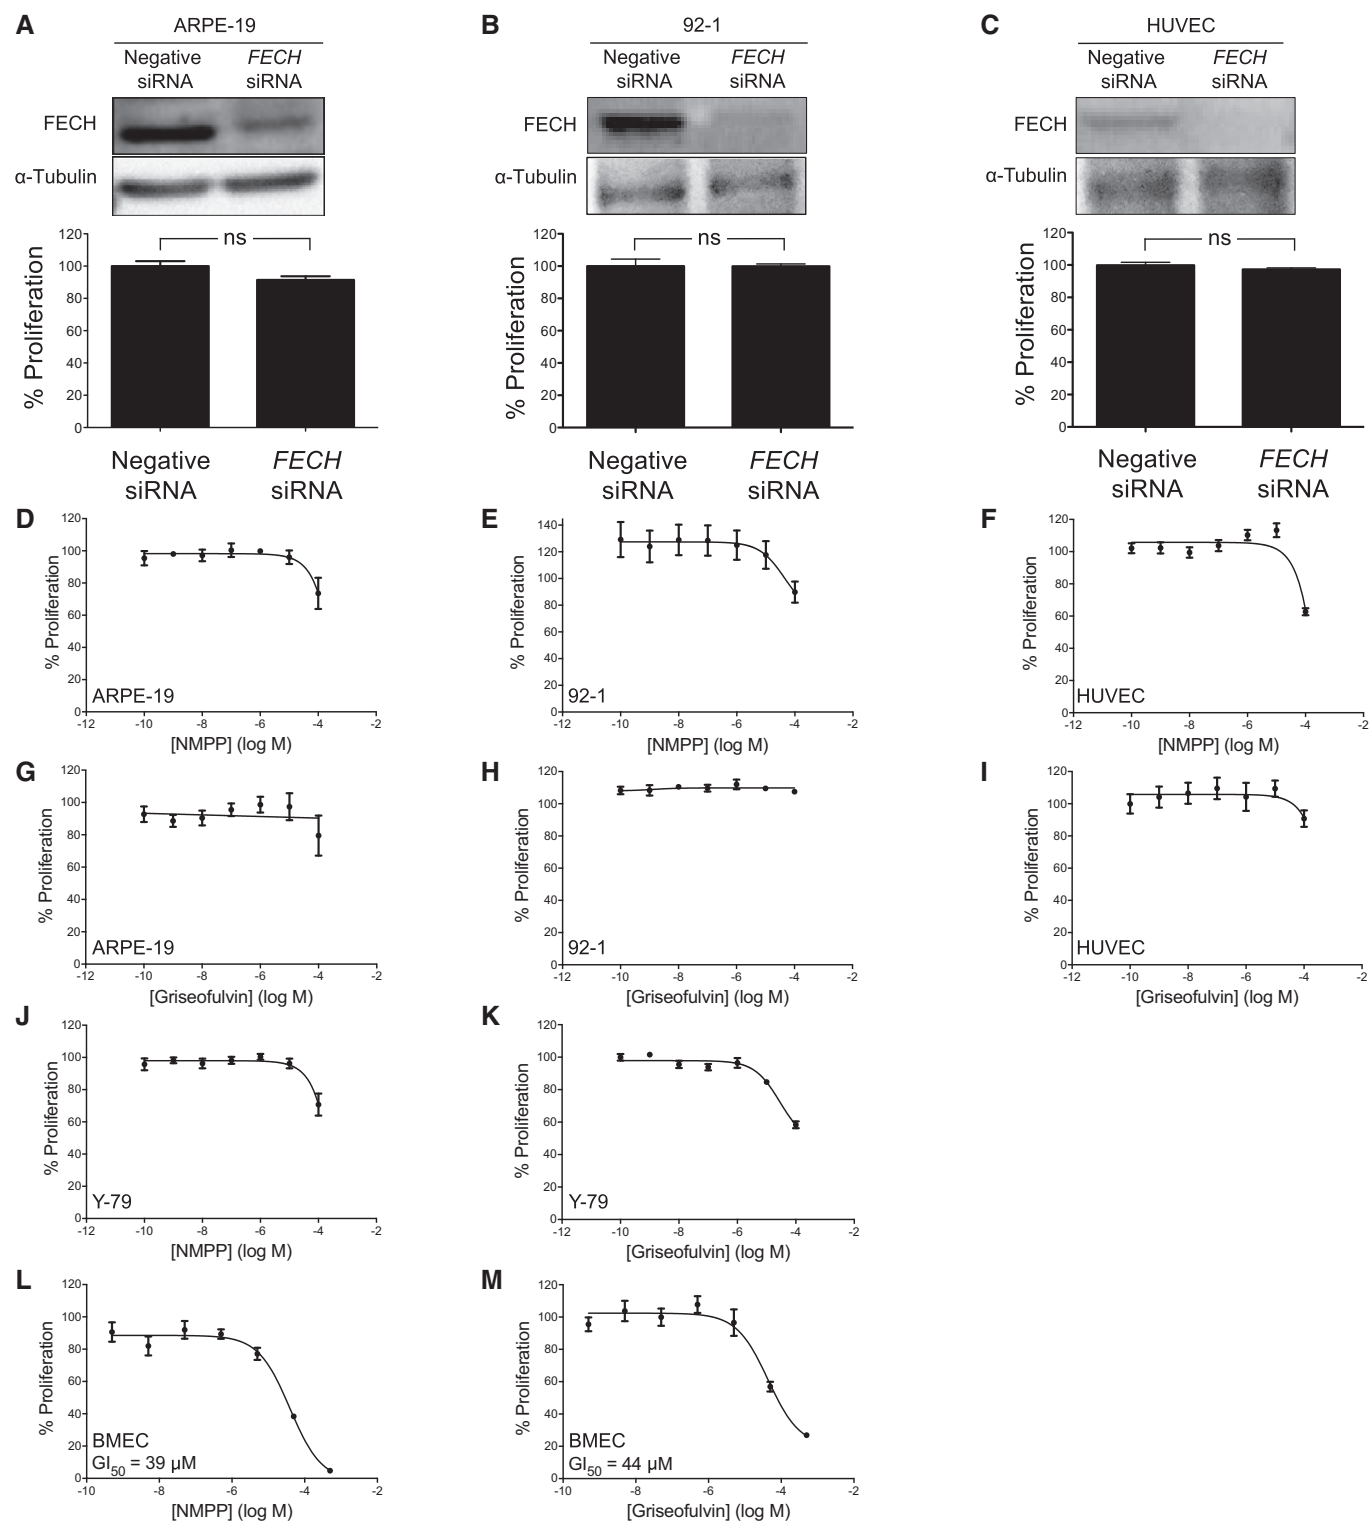

Figure EV4.

**Figure EV4. FECH knockdown or inhibition has no significant effects on proliferation of other ocular or macrovascular cell types.**

- A Effect of *FECH* knockdown on proliferation of ARPE-19 retinal pigment epithelial cells. ns, non-significant,  $P > 0.05$ , two-tailed unpaired Student's *t*-test.  
 B Effect of *FECH* knockdown on proliferation of 92-1 uveal melanoma cells. ns, non-significant,  $P > 0.05$ , two-tailed unpaired Student's *t*-test.  
 C Effect of *FECH* knockdown on proliferation of human umbilical vein endothelial cells (HUVECs). ns, non-significant,  $P > 0.05$ , two-tailed unpaired Student's *t*-test.  
 D Effect of NMPP on proliferation of ARPE-19 cells.  
 E Effect of NMPP on proliferation of 92-1 cells.  
 F Effect of NMPP on proliferation of HUVECs.  
 G Effect of griseofulvin on proliferation of ARPE-19 cells.  
 H Effect of griseofulvin on proliferation of 92-1 cells.  
 I Effect of griseofulvin on proliferation of HUVECs.  
 J Effect of NMPP on proliferation of Y-79 retinoblastoma cells.  
 K Effect of griseofulvin on proliferation of Y-79 cells.  
 L Effect of NMPP on proliferation of human brain microvascular endothelial cells (BMECs).  
 M Effect of griseofulvin on proliferation of BMECs.

Data information: Graphs show mean  $\pm$  SEM,  $n = 3$ . Representative figures from three experiments are shown in (A, B, and C).  
 Source data are available online for this figure.

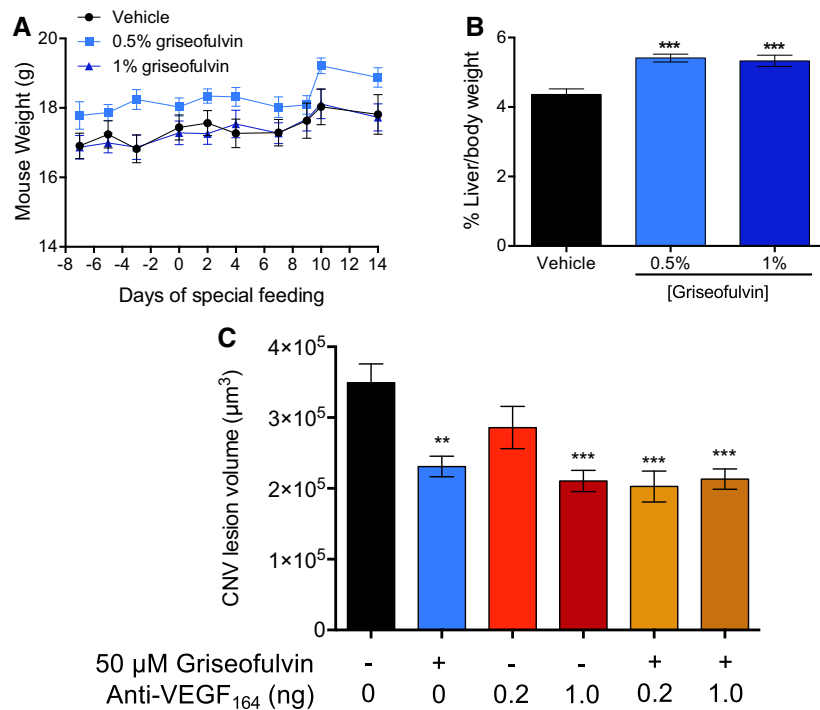

**Figure EV5. Oral griseofulvin's systemic effects and combination with anti-VEGF therapy.**

- A Oral griseofulvin treatment did not significantly change mouse weights during the experimental time course.  $P > 0.05$ , two-way repeated measures ANOVA with Tukey's *post hoc* tests ( $n = 10$  mice per group).  
 B Griseofulvin increased liver weights as expected with these treatments, confirming drug intake and systemic metabolism. \*\*\* $P = 0.0001$  and  $0.002$  versus vehicle, ANOVA with Dunnett's *post hoc* tests ( $n = 6$  mice per group).  
 C Intravitreal griseofulvin in combination with anti-VEGF<sub>164</sub> therapy in L-CNV. Treatment with indicated single agents and combinations. \*\* $P = 0.0011$  versus vehicle; \*\*\* $P = 0.0002$ ,  $< 0.0001$ ,  $0.0001$ , versus vehicle, left to right, respectively, ANOVA with Tukey's *post hoc* tests. All other comparisons were non-significant ( $n = 6$ – $10$  mice per group).

Data information: Graphs show mean  $\pm$  SEM.
